# Supplementary material for: Fungal loop transfer of nitrogen depends on biocrust constituents and nitrogen form
Source: Copernicus journal article supplement (doi:10.5194/bg-15-3831-2018), 2018-06-22

Supplement of Biogeosciences, 15, 3831–3840, 2018  
<https://doi.org/10.5194/bg-15-3831-2018-supplement>  
© Author(s) 2018. This work is distributed under  
the Creative Commons Attribution 4.0 License.

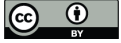

*Supplement of*

## **Fungal loop transfer of nitrogen depends on biocrust constituents and nitrogen form**

**Zachary T. Aanderud et al.**

*Correspondence to:* Zachary T. Aanderud ([zachary\\_aanderud@byu.edu](mailto:zachary_aanderud@byu.edu))

The copyright of individual parts of the supplement might differ from the CC BY 4.0 License.

**Supplemental Figure 1** The field design of circular plots (radius = 1.0 m) receiving minor, localized rainfall events. An example of five biocrust (BC) and *Achnatherum hymenoides* (AH) samples occurring randomly along eight axes (e.g., N, NE, E, SE, S, SW, W, and NW) radiating from the center of each plot (A). An isotopically labeled (0.30 mg  $^{15}\text{N}$ ) rainfall event (2.5 mm) was sprayed onto a central circle (radius = 5 cm). Rainfall events occurred on the surfaces of cyanobacteria-dominated (B) and moss-dominated biocrust.

A. circular plots

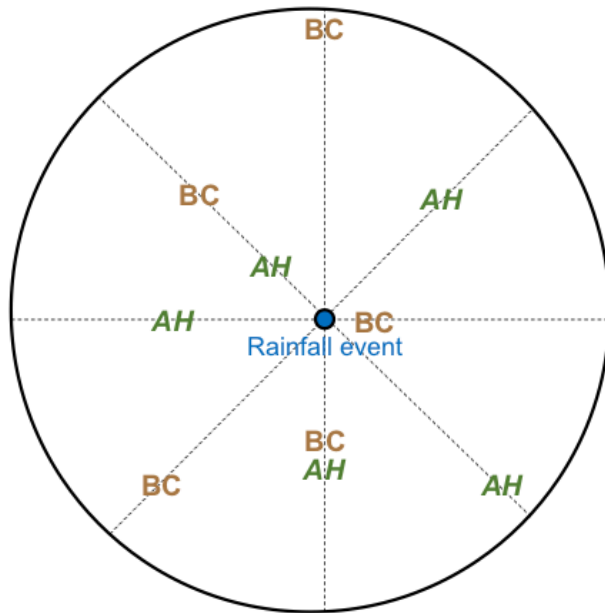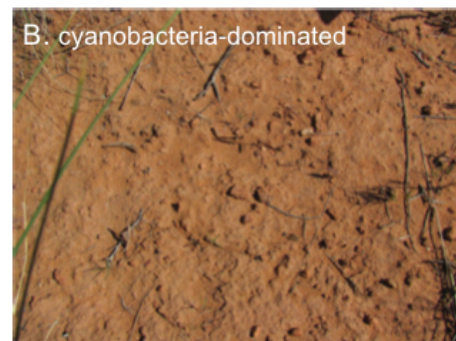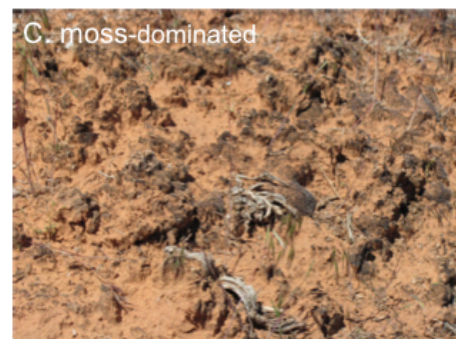

Supplement: Supplementary file 1 [file bg-15-3831-2018-supplement.pdf]
